# Supplementary material
Source: HighWire-hosted journal article supplement (https://qdcxjkg.com/highwire/filestream/113845/field_highwire_adjunct_files/0/FF_VI_200_vs_FP_500_supplementary_material.pdf)
Supplement: FF_VI_200_vs_FP_500_supplementary_material.pdf [file FF_VI_200_vs_FP_500_supplementary_material.pdf]

# **Once-daily fluticasone furoate alone or combined with vilanterol in persistent asthma**

**Paul M. O’Byrne, Eugene R. Bleecker, Eric D. Bateman, William W. Busse,  
Ashley Woodcock, Richard Forth, William T. Toler, Loretta Jacques, and Jan  
Lötvall**

## **ONLINE SUPPLEMENT**

### ***Prohibited medication during the study***

Any prescription or non-prescription medication that could affect the course of asthma was prohibited during the study. This included all corticosteroids (with the exception of intranasal sprays and mild topical creams), long-acting  $\beta_2$  agonists (LABAs), leukotriene modifiers, slow-release bronchodilators, and any medication that could interact with corticosteroid or sympathomimetic amines.

**TABLE S1** Mean change from baseline and treatment differences for the co-primary endpoints of trough forced expiratory volume in 1 s (FEV<sub>1</sub>; last observation carried forward) and weighted mean 0–24h FEV<sub>1</sub> (subset of patients who performed serial FEV<sub>1</sub>) at week 24 and the powered secondary endpoint of percentage rescue-free 24-h periods during the 24-week treatment period (sensitivity analysis population)

|                                                         | <b>FF/VI 200/25µg<br/>OD (N=197)</b> | <b>FF 200µg OD<br/>(N=194)</b> | <b>FP 500µg BD<br/>(N=195)</b> |
|---------------------------------------------------------|--------------------------------------|--------------------------------|--------------------------------|
| <b>Trough FEV<sub>1</sub> (week 24)</b>                 |                                      |                                |                                |
| n                                                       | 169                                  | 172                            | 179                            |
| LS mean change from baseline,<br>mL (SE)                | 329 (29.3)                           | 165 (29.1)                     | 156 (28.4)                     |
| Treatment difference vs FF 200µg<br>OD, mL (95% CI)     | 164 (83, 245)<br>p<0.001             |                                |                                |
| Treatment difference vs FP 500µg<br>BD, mL (95% CI)     | 173 (93, 253)<br>p<0.001             | 9 (-71, 89)                    |                                |
| <b>0–24-h wmFEV<sub>1</sub> (week 24)</b>               |                                      |                                |                                |
| n                                                       | 72                                   | 69                             | 76                             |
| LS mean change from baseline,<br>mL                     | 339 (44.6)                           | 261 (46.1)                     | 215 (43.7)                     |
| Treatment difference vs FF 200µg<br>OD, mL (95% CI)     | 78 (-49, 205)<br>p=0.230             |                                |                                |
| Treatment difference vs FP 500µg<br>BD, mL (95% CI)     | 124 (1, 247)<br>p=0.047              |                                |                                |
| <b>Percentage rescue-free 24-h periods (weeks 1–24)</b> |                                      |                                |                                |

|                                                 |                  |             |             |
|-------------------------------------------------|------------------|-------------|-------------|
| n                                               | 176              | 177         | 183         |
| LS mean change from baseline<br>(SE)            | 38.8 (2.55)      | 25.6 (2.54) | 31.7 (2.49) |
| Treatment difference vs FF 200µg<br>OD (95% CI) | 13.2 (6.2, 20.3) |             |             |
| Treatment difference vs FP 500µg<br>BD (95% CI) | 7.1 (0.1, 14.1)  |             |             |
|                                                 | p<0.001          |             |             |
|                                                 | p=0.046          |             |             |

---

ANCOVA model with covariates for baseline, region, age, sex and treatment.

BD: twice-daily; CI: confidence interval; FEV<sub>1</sub>: forced expiratory volume in 1 s; FF: fluticasone furoate; FP: fluticasone propionate; LS: least squares; OD: once-daily; SE: standard error; VI: vilanterol; wm: weighted mean.

**TABLE S2** Summary of percentage of trough FEV<sub>1</sub> (L) at week 24 relative to post-salbutamol FEV<sub>1</sub> at screening using the last observation carried forward method (intent-to-treat [ITT] population)

| <b>Treatment</b>  | <b>N</b> | <b>n</b> | <b>Mean</b> | <b>SD</b> | <b>Median</b> | <b>Min.</b> | <b>Max.</b> |
|-------------------|----------|----------|-------------|-----------|---------------|-------------|-------------|
| FF/VI 200/25µg OD | 197      | 193      | 96.1        | 12.78     | 96.8          | 54          | 136         |
| FF 200µg OD       | 194      | 186      | 85.7        | 24.28     | 90.5          | -100        | 138         |
| FP 500µg BD       | 195      | 191      | 85.6        | 19.47     | 88.5          | -22         | 131         |

BD: twice-daily; FF: fluticasone furoate; FP: fluticasone propionate; OD: once-daily; SD: standard deviation; VI: vilanterol.

**TABLE S3** Summary of adverse events by treatment group (ITT population)

|                                                                                    | FF/VI                  |                        |                        |
|------------------------------------------------------------------------------------|------------------------|------------------------|------------------------|
|                                                                                    | 200/25µg OD<br>(N=197) | FF 200µg OD<br>(N=194) | FP 500µg BD<br>(N=195) |
| <b>AEs, n (%)</b>                                                                  |                        |                        |                        |
| On-treatment                                                                       | 92 (47)                | 90 (46)                | 97 (50)                |
| Treatment-related AEs                                                              | 17 (9)                 | 8 (4)                  | 16 (8)                 |
| AEs leading to permanent discontinuation<br>of study drug or withdrawal from study | 7 (4)                  | 3 (2)                  | 2 (1)                  |
| <b>Most frequent on-treatment AEs, n (%)<sup>a</sup></b>                           |                        |                        |                        |
| Nasopharyngitis                                                                    | 25 (13)                | 27 (14)                | 39 (20)                |
| Headache                                                                           | 11 (6)                 | 13 (7)                 | 15 (8)                 |
| Cough                                                                              | 3 (2)                  | 6 (3)                  | 13 (7)                 |
| Respiratory tract infection, viral                                                 | 7 (4)                  | 7 (4)                  | 7 (4)                  |
| Influenza                                                                          | 5 (3)                  | 8 (4)                  | 7 (4)                  |
| Bronchitis                                                                         | 7 (4)                  | 6 (3)                  | 6 (3)                  |
| Oropharyngeal pain                                                                 | 4 (2)                  | 8 (4)                  | 7 (4)                  |
| Sinusitis                                                                          | 3 (2)                  | 7 (4)                  | 4 (2)                  |
| Dysphonia                                                                          | 6 (3)                  | 2 (1)                  | 4 (2)                  |
| Pharyngitis                                                                        | 4 (2)                  | 2 (1)                  | 6 (3)                  |
| Rhinitis                                                                           | 1 (<1)                 | 2 (1)                  | 7 (4)                  |
| Oropharyngeal candidiasis                                                          | 5 (3)                  | 1 (<1)                 | 2 (1)                  |

<sup>a</sup>Occurring in  $\geq 3\%$  of patients in any treatment group.

AEs: adverse events; BD: twice-daily; FF: fluticasone furoate; FP: fluticasone propionate; OD: once-daily; VI: vilanterol.

**FIGURE S1.** Statistical hierarchy.

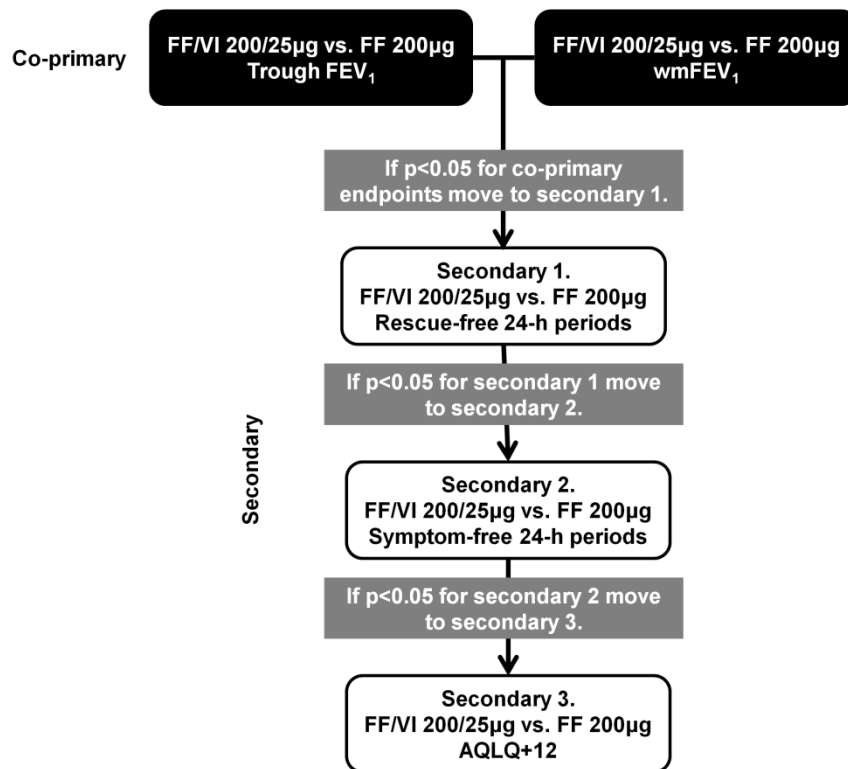

AQLQ+12: Asthma Quality of Life Questionnaire; FEV<sub>1</sub>: forced expiratory volume in 1 s; FF: fluticasone furoate; FP: fluticasone propionate; VI: vilanterol; wm: weighted mean.

**FIGURE S2** Summary of adjusted treatment differences for the co-primary endpoints of trough FEV<sub>1</sub> and weighted mean (wm) FEV<sub>1</sub>, and powered secondary endpoint of percentage rescue-free 24-h periods for (a) fluticasone furoate/vilanterol (FF/VI) 200/25µg *versus* FF 200µg and (b) FF/VI 200/25µg *versus* fluticasone propionate (FP) 500µg in the ITT last observation carried forward population, ITT repeat measures population (trough FEV<sub>1</sub> only), per protocol population and sensitivity analysis population.

**a**

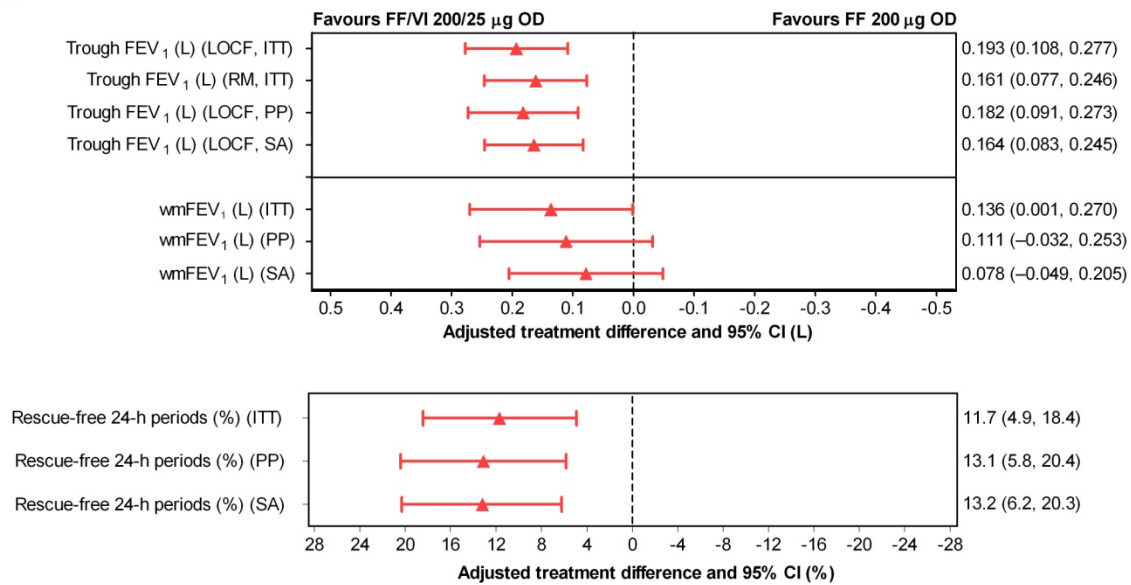

**b**

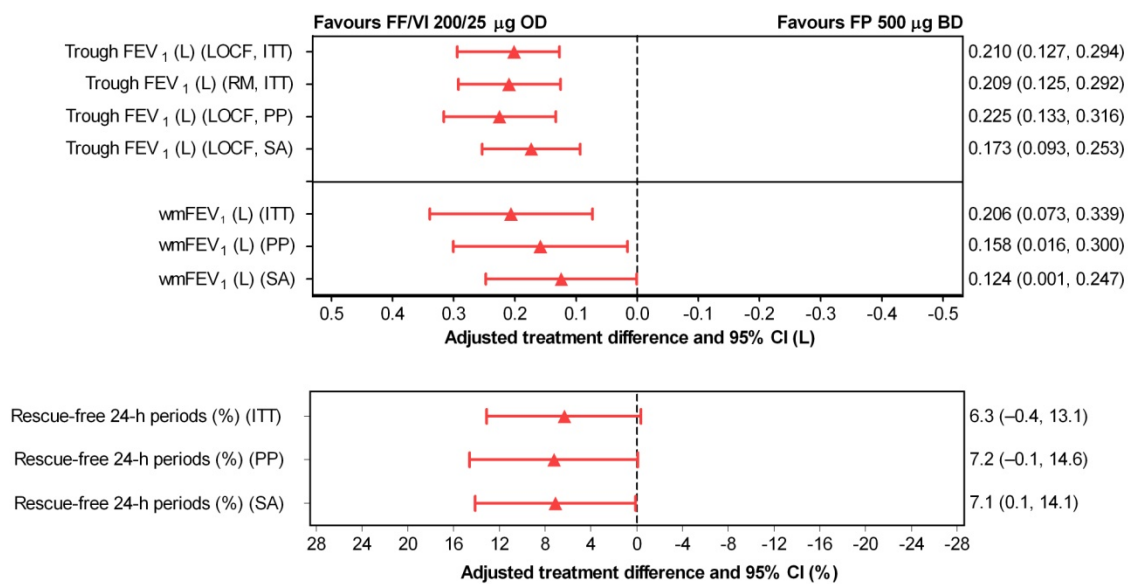

BD: twice-daily; CI: confidence interval; FEV<sub>1</sub>: forced expiratory volume in 1 s; FF: fluticasone furoate; FP: fluticasone propionate; ITT: intent to treat; LOCF: last observation carried forward; LS: least squares; OD: once-daily; PP: per protocol; RM: repeat measures; SA: sensitivity analysis; VI: vilanterol; wm: weighted mean.



**FIGURE S3.** Mean change from baseline in morning peak expiratory flow (ITT population).

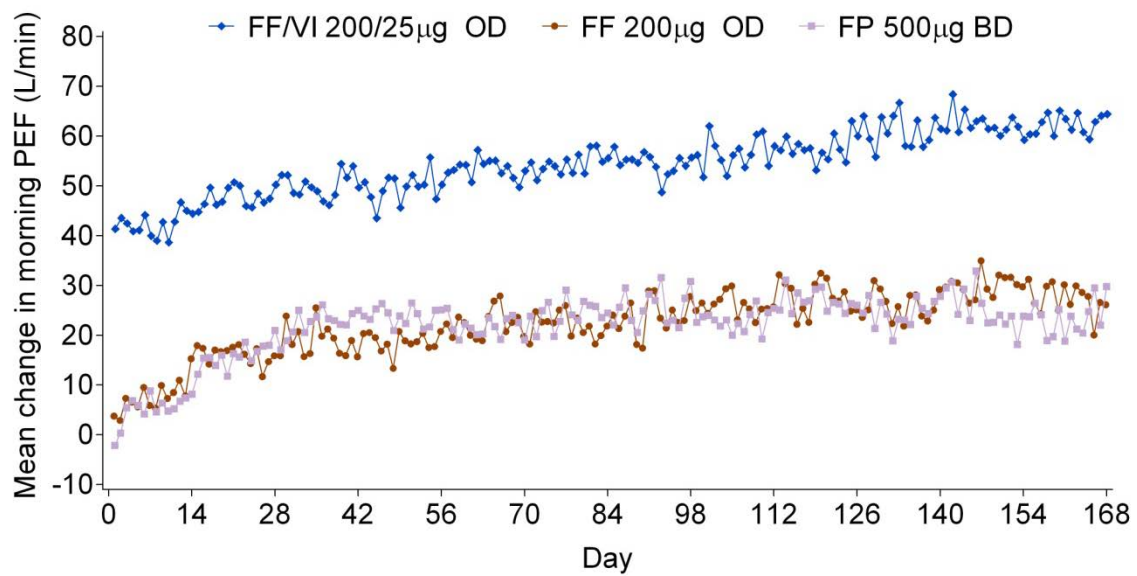

BD: twice-daily; FF: fluticasone furoate; FP: fluticasone propionate; LS: least squares; OD: once-daily; PEF: peak expiratory flow; VI: vilanterol.

**FIGURE S4.** Box plot of percentage of trough FEV<sub>1</sub> at week 24 relative to post-salbutamol FEV<sub>1</sub> at screening using last observation carried forward method (ITT population)

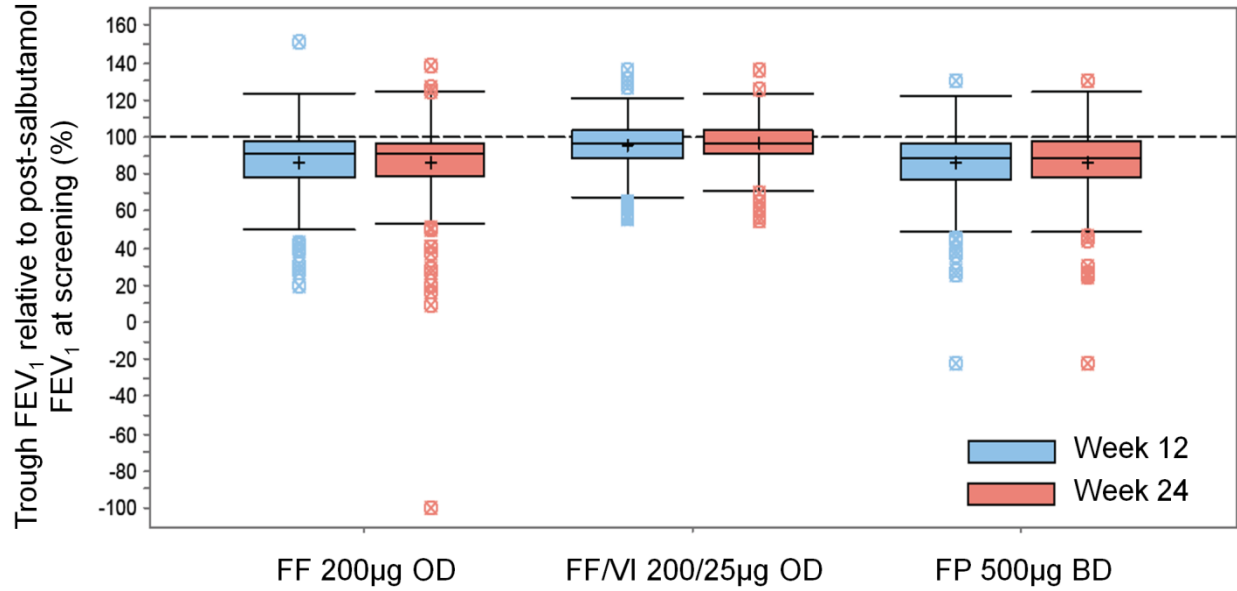

BD: twice-daily; FEV<sub>1</sub>: forced expiratory volume in 1 s; FF: fluticasone furoate; FP: fluticasone propionate;  
OD: once-daily; VI: vilanterol.

**FIGURE S5.** Adjusted LS mean ratio to baseline 24-h urinary cortisol (UC) excretion by treatment group at week 24 (UC population).

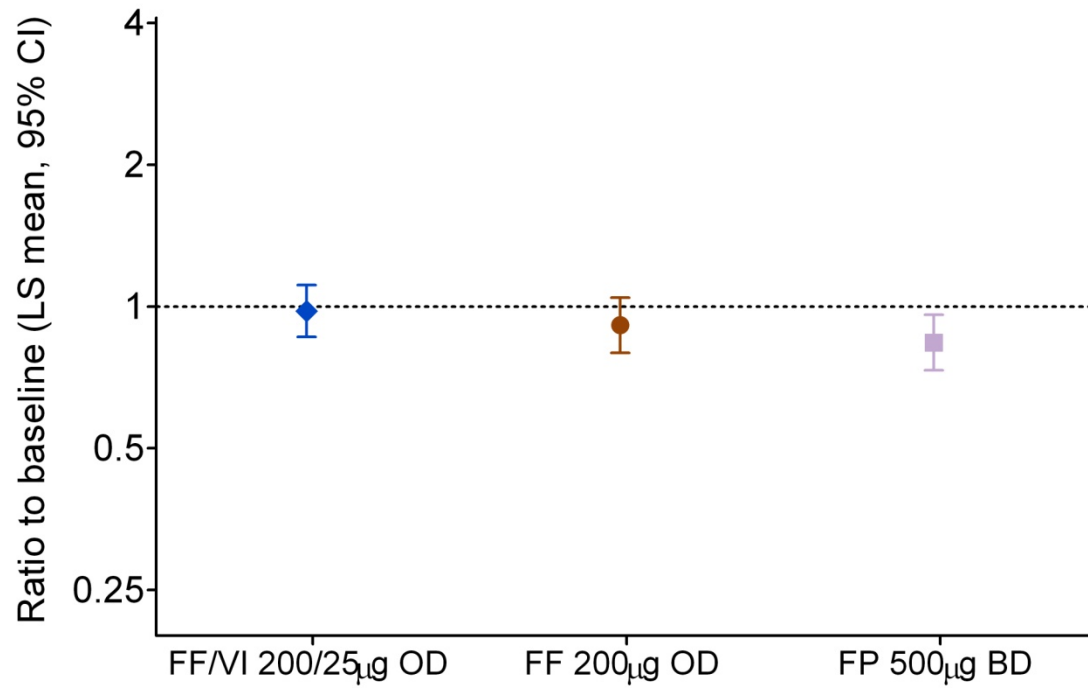

BD: twice-daily; CI: confidence interval; FF: fluticasone furoate; FP: fluticasone propionate; LS: least squares; OD: once-daily; VI: vilanterol.
